# Supplementary material for: The root pathogen Aphanomyces euteiches secretes modular proteases in pea apoplast during host infection
Source: Front Plant Sci. 2023 Mar 27;14:1140101. doi: 10.3389/fpls.2023.1140101 (PMC10084794; doi:10.3389/fpls.2023.1140101)
Supplement: Supplementary file 2 [file Table_1.xlsx]

## Sheet: ST S1 Peptidase
ST S1 : Peptidases sequences within the root pathogen Aphanomyces euteiches
Pfam domains predicted using InterProScan algorithm
*ID number are related to AphanoDB database
**SP (SignalP prediction) | TM (TMHMM prediction)
ID*	Pfam	**SignalP (SP)/ TMHMM ™
Ae201684P_392.t1	PF06337 DUSP domain / PF01363 FYVE zinc finger	-SP
Ae201684P_469.t1	PF01398 JAB1/Mov34/MPN/PAD-1 ubiquitin protease	-SP
Ae201684P_566.t1	PF01112 Asparaginase	-SP
Ae201684P_696.t1	PF03577 Peptidase family C69	-SP
Ae201684P_740.t1	PF06337 DUSP domain / PF00443 Ubiquitin carboxyl-terminal hydrolase / PF00787 PX domain	-SP
Ae201684P_741.t1	PF00814 Glycoprotease family	-SP
Ae201684P_798.t1	PF00561 alpha/beta hydrolase fold	-SP
Ae201684P_818.t1	PF00450 Serine carboxypeptidase	-SP
Ae201684P_819.t1	PF00450 Serine carboxypeptidase	-SP
Ae201684P_820.t1	PF00450 Serine carboxypeptidase	-SP
Ae201684P_821.t1	PF00450 Serine carboxypeptidase	-SP
Ae201684P_822.t1	PF00450 Serine carboxypeptidase	-SP
Ae201684P_826.t1	PF00026 Eukaryotic aspartyl protease	-SP
Ae201684P_877.t1	PF00734 Fungal cellulose binding domain / PF00112 Papain family cysteine protease	-SP
Ae201684P_881.t1	PF00112 Papain family cysteine protease	+SP-TM
Ae201684P_890.t1	PF00112 Papain family cysteine protease	-SP
Ae201684P_930.t1	PF00227 Proteasome subunit / PF10584 Proteasome subunit A N-terminal signature	-SP
Ae201684P_967.t1	PF05649 Peptidase family M13 / PF01431 Peptidase family M13	-SP
Ae201684P_968.t1	PF05649 Peptidase family M13 / PF01431 Peptidase family M13	-SP
Ae201684P_977.t1	PF00112 Papain family cysteine protease	-SP
Ae201684P_979.t1	PF00112 Papain family cysteine protease	-SP
Ae201684P_1019.t1	PF00326 Prolyl oligopeptidase family	-SP
Ae201684P_1056.t1	PF00450 Serine carboxypeptidase	-SP
Ae201684P_1132.t1	PF02130 Uncharacterized protein family UPF0054	-SP
Ae201684P_1459.t1	PF00450 Serine carboxypeptidase	-SP
Ae201684P_1460.t1	PF00450 Serine carboxypeptidase	-SP
Ae201684P_1461.t1	PF00450 Serine carboxypeptidase	-SP
Ae201684P_1462.t1	PF00450 Serine carboxypeptidase	-SP
Ae201684P_1463.t1	PF00450 Serine carboxypeptidase	-SP
Ae201684P_1464.t1	PF00450 Serine carboxypeptidase	-SP
Ae201684P_1581.t1	PF00443 Ubiquitin carboxyl-terminal hydrolase	-SP
Ae201684P_1597.t1	PF06337 DUSP domain / PF00612 IQ calmodulin-binding motif / PF00787 PX domain	-SP
Ae201684P_1636.t1	PF00227 Proteasome subunit	-SP
Ae201684P_1946.t1	PF00227 Proteasome subunit	-SP
Ae201684P_1975.t1	PF00443 Ubiquitin carboxyl-terminal hydrolase / PF06839 GRF zinc finger	-SP
Ae201684P_2062.t1	PF03577 Peptidase family C69	-SP
Ae201684P_2444.t1	PF00078 Reverse transcriptase (RNA-dependent DNA polymerase)	-SP
Ae201684P_2485.t1	PF05649 Peptidase family M13 / PF01431 Peptidase family M13	+SP-TM
Ae201684P_2496.t1	PF00078 Reverse transcriptase (RNA-dependent DNA polymerase)	-SP
Ae201684P_2507.t1	PF01080 Presenilin	-SP
Ae201684P_2510.t1	PF07727 Reverse transcriptase (RNA-dependent DNA polymerase) / PF01431 Peptidase family M13	-SP
Ae201684P_2510.t2	PF01431 Peptidase family M13	-SP
Ae201684P_2515.t1	PF05649 Peptidase family M13 / PF01431 Peptidase family M13	+SP-TM
Ae201684P_2526.t1	PF05649 Peptidase family M13	+SP-TM
Ae201684P_2612.t1	PF00026 Eukaryotic aspartyl protease	-SP
Ae201684P_2614.t1	PF01432 Peptidase family M3	-SP
Ae201684P_2698.t1	PF01694 Rhomboid family	-SP
Ae201684P_2765.t1	PF09768 Peptidase M76 family	-SP
Ae201684P_2839.t1	PF05577 Serine carboxypeptidase S28	-SP
Ae201684P_2840.t1	PF05577 Serine carboxypeptidase S28	-SP
Ae201684P_2899.t1	PF05577 Serine carboxypeptidase S28	-SP
Ae201684P_2900.t1	PF05577 Serine carboxypeptidase S28	-SP
Ae201684P_2918.t1	PF00443 Ubiquitin carboxyl-terminal hydrolase	-SP
Ae201684P_2939.t1	PF02902 Ulp1 protease family, C-terminal catalytic domain	-SP
Ae201684P_2941.t1	PF07722 Peptidase C26	-SP
Ae201684P_2942.t1	PF07722 Peptidase C26	-SP
Ae201684P_2945.t1	PF05195 Aminopeptidase P, N-terminal domain / PF00557 Metallopeptidase family M24	-SP
Ae201684P_2950.t1	PF00227 Proteasome subunit / PF10584 Proteasome subunit A N-terminal signature	+SP+TM
Ae201684P_2952.t1	PF00675 Insulinase (Peptidase family M16) / PF05193 Peptidase M16 inactive domain	-SP
Ae201684P_2963.t1	PF07722 Peptidase C26	-SP
Ae201684P_2976.t1	PF00627 UBA/TS-N domain / PF00240 Ubiquitin family / PF09668 Aspartyl protease	-SP
Ae201684P_3202.t1	PF04258 Signal peptide peptidase	-SP
Ae201684P_3220.t1	PF00112 Papain family cysteine protease	+SP-TM
Ae201684P_3411.t1	PF03575 Peptidase family S51	-SP
Ae201684P_3583.t1	PF14295 PAN domain / PF13365 Trypsin-like peptidase domain	+SP-TM
Ae201684P_3619.t1	PF03051 Peptidase C1-like family	-SP
Ae201684P_3622.t1	PF14295 PAN domain / PF00082 Subtilase family	+SP-TM
Ae201684P_3656.t1	PF00082 Subtilase family	+SP-TM
Ae201684P_3870.t1	PF02148 Zn-finger in ubiquitin-hydrolases and other protein / PF00443 Ubiquitin carboxyl-terminal hydrolase	-SP
Ae201684P_3895.t1	PF00641 Zn-finger in Ran binding protein and others / PF00443 Ubiquitin carboxyl-terminal hydrolase	-SP
Ae201684P_3915.t1	PF01650 Peptidase C13 family	-SP
Ae201684P_3920.t1	PF09286 Pro-kumamolisin, activation domain	-SP
Ae201684P_3927.t1	PF09286 Pro-kumamolisin, activation domain / PF00082 Subtilase family	-SP
Ae201684P_4066.t1	PF01067 Calpain large subunit, domain III / PF00168 C2 domain / PF00648 Calpain family cysteine protease / PF00397 WW domain	-SP
Ae201684P_4079.t1	PF03577 Peptidase family C69	-SP
Ae201684P_4213.t1	PF03572 Peptidase family S41	-SP
Ae201684P_4220.t1	PF03572 Peptidase family S41	-SP
Ae201684P_4425.t1	PF05577 Serine carboxypeptidase S28	+SP-TM
Ae201684P_4428.t1	PF00112 Papain family cysteine protease	-SP
Ae201684P_4517.t1	PF00675 Insulinase (Peptidase family M16) / PF16187 Middle or third domain of peptidase_M16 / PF05193 Peptidase M16 inactive domain	-SP
Ae201684P_4582.t1	PF01431 Peptidase family M13	+SP+TM
Ae201684P_4583.t1	PF05649 Peptidase family M13 / PF01431 Peptidase family M13	+SP+TM
Ae201684P_4584.t1	PF05649 Peptidase family M13 / PF01431 Peptidase family M13	+SP+TM
Ae201684P_4585.t1	PF10604 Polyketide cyclase / dehydrase and lipid transport	-SP
Ae201684P_4590.t1	PF04258 Signal peptide peptidase	-SP
Ae201684P_4608.t1	PF09286 Pro-kumamolisin, activation domain / PF00082 Subtilase family	+SP-TM
Ae201684P_4615.t1	PF08246 Cathepsin propeptide inhibitor domain (I29) / PF02221 ML domain / PF00112 Papain family cysteine protease	+SP-TM
Ae201684P_4616.t1	PF08246 Cathepsin propeptide inhibitor domain (I29) / PF02221 ML domain / PF00112 Papain family cysteine protease	+SP-TM
Ae201684P_4621.t1	PF00227 Proteasome subunit	-SP
Ae201684P_4632.t1	PF00450 Serine carboxypeptidase	-SP
Ae201684P_4647.t1	PF00450 Serine carboxypeptidase / PF00439 Bromodomain / PF00400 WD domain, G-beta repeat / PF13771 PHD-like zinc-binding domain	-SP
Ae201684P_4649.t1	PF00450 Serine carboxypeptidase	-SP
Ae201684P_4650.t1	PF00450 Serine carboxypeptidase	-SP
Ae201684P_4651.t1	PF00450 Serine carboxypeptidase	-SP
Ae201684P_4652.t1	PF00450 Serine carboxypeptidase	-SP
Ae201684P_4662.t1	PF03577 Peptidase family C69	-SP
Ae201684P_4784.t1	PF00246 Zinc carboxypeptidase	+SP+TM
Ae201684P_4793.t1	PF00648 Calpain family cysteine protease	-SP
Ae201684P_4860.t1	PF13688 Metallo-peptidase family M12 / PF00328 Histidine phosphatase superfamily (branch 2)	-SP
Ae201684P_5100.t1	PF12580 Tripeptidyl peptidase II / PF00082 Subtilase family	-SP
Ae201684P_5101.t1	PF12580 Tripeptidyl peptidase II / PF00082 Subtilase family	-SP
Ae201684P_5103.t1	PF12580 Tripeptidyl peptidase II / PF00082 Subtilase family	-SP
Ae201684P_5198.t1	PF00246 Zinc carboxypeptidase	-SP
Ae201684P_5198.t2	PF00246 Zinc carboxypeptidase	-SP
Ae201684P_5206.t1	PF03572 Peptidase family S41	-SP
Ae201684P_5239.t1	PF00326 Prolyl oligopeptidase family	-SP
Ae201684P_5242.t1	PF02897 Prolyl oligopeptidase, N-terminal beta-propeller domain / PF00326 Prolyl oligopeptidase family	-SP
Ae201684P_5243.t1	PF02897 Prolyl oligopeptidase, N-terminal beta-propeller domain	-SP
Ae201684P_5296.t1	PF11838 ERAP1-like C-terminal domain / PF01433 Peptidase family M1 domain	-SP
Ae201684P_5298.t1	PF00078 Reverse transcriptase (RNA-dependent DNA polymerase) / PF00665 Integrase core domain	-SP
Ae201684P_5298.t2	PF00078 Reverse transcriptase (RNA-dependent DNA polymerase) / PF00385 Chromo (CHRromatin Organisation MOdifier) domain	-SP
Ae201684P_5365.t1	PF00004 ATPase family associated with various cellular activities (AAA) / PF01434 Peptidase family M41	-SP
Ae201684P_5560.t1	PF06703 Microsomal signal peptidase 25 kDa subunit (SPC25)	+SP+TM
Ae201684P_5584.t1	PF01694 Rhomboid family	-SP
Ae201684P_5682.t1	PF01080 Presenilin	-SP
Ae201684P_5712.t1	PF00675 Insulinase (Peptidase family M16) / PF05193 Peptidase M16 inactive domain	-SP
Ae201684P_5744.t1	PF00557 Metallopeptidase family M24	+SP+TM
Ae201684P_5761.t1	PF00082 Subtilase family	-SP
Ae201684P_5765.t1	PF00082 Subtilase family	+SP-TM
Ae201684P_5792.t1	PF00883 Cytosol aminopeptidase family, catalytic domain	-SP
Ae201684P_5879.t1	PF02129 X-Pro dipeptidyl-peptidase (S15 family) / PF08530 X-Pro dipeptidyl-peptidase C-terminal non-catalytic domain	+SP-TM
Ae201684P_5903.t1	PF00026 Eukaryotic aspartyl protease	+SP-TM
Ae201684P_5981.t1	PF02897 Prolyl oligopeptidase, N-terminal beta-propeller domain / PF00326 Prolyl oligopeptidase family	-SP
Ae201684P_6046.t1	PF01080 Presenilin	-SP
Ae201684P_6158.t1	PF15801 zf-MYND-like zinc finger, mRNA-binding / PF00557 Metallopeptidase family M24	-SP
Ae201684P_6179.t1	PF04573 Signal peptidase subunit	-SP
Ae201684P_6194.t1	PF02129 X-Pro dipeptidyl-peptidase (S15 family) / PF08530 X-Pro dipeptidyl-peptidase C-terminal non-catalytic domain	-SP
Ae201684P_6206.t1	PF00443 Ubiquitin carboxyl-terminal hydrolase	-SP
Ae201684P_6284.t1	PF00026 Eukaryotic aspartyl protease	-SP
Ae201684P_6295.t1	PF00227 Proteasome subunit	-SP
Ae201684P_6516.t1	PF06337 DUSP domain	-SP
Ae201684P_6601.t1	PF02163 Peptidase family M50	-SP
Ae201684P_6834.t1	PF00930 Dipeptidyl peptidase IV (DPP IV) N-terminal region / PF00326 Prolyl oligopeptidase family / PF01847 VHL beta domain	-SP
Ae201684P_6994.t1	PF00078 Reverse transcriptase (RNA-dependent DNA polymerase) / PF13975 gag-polyprotein putative aspartyl protease	-SP
Ae201684P_7175.t1	PF01435 Peptidase family M48	-SP
Ae201684P_7247.t1	PF03572 Peptidase family S41	-SP
Ae201684P_7248.t1	PF01432 Peptidase family M3	-SP
Ae201684P_7249.t1	PF01432 Peptidase family M3	+SP+TM
Ae201684P_7250.t1	PF01432 Peptidase family M3	-SP
Ae201684P_7253.t1	PF01432 Peptidase family M3	-SP
Ae201684P_7254.t1	PF01432 Peptidase family M3	-SP
Ae201684P_7255.t1	PF01432 Peptidase family M3	-SP
Ae201684P_7256.t1	PF01432 Peptidase family M3	-SP
Ae201684P_7257.t1	PF01432 Peptidase family M3	-SP
Ae201684P_7259.t1	PF01432 Peptidase family M3	-SP
Ae201684P_7260.t1	PF01432 Peptidase family M3	-SP
Ae201684P_7261.t1	PF01432 Peptidase family M3	-SP
Ae201684P_7262.t1	PF01432 Peptidase family M3	-SP
Ae201684P_7263.t1	PF01432 Peptidase family M3	-SP
Ae201684P_7264.t1	PF01432 Peptidase family M3	-SP
Ae201684P_7265.t1	PF01432 Peptidase family M3	-SP
Ae201684P_7336.t1	PF05649 Peptidase family M13	+SP-TM
Ae201684P_7337.t1	PF01431 Peptidase family M13	-SP
Ae201684P_7338.t1	PF05649 Peptidase family M13	+SP-TM
Ae201684P_7339.t1	PF01431 Peptidase family M13	-SP
Ae201684P_7340.t1	PF05649 Peptidase family M13	+SP-TM
Ae201684P_7341.t1	PF05649 Peptidase family M13	-SP
Ae201684P_7342.t1	PF01431 Peptidase family M13	-SP
Ae201684P_7343.t1	PF05649 Peptidase family M13 / PF01431 Peptidase family M13	+SP-TM
Ae201684P_7344.t1	PF05649 Peptidase family M13 / PF01431 Peptidase family M13	-SP
Ae201684P_7345.t1	PF05649 Peptidase family M13 / PF01431 Peptidase family M13	+SP-TM
Ae201684P_7499.t1	PF00026 Eukaryotic aspartyl protease	-SP
Ae201684P_7509.t1	PF00112 Papain family cysteine protease	+SP-TM
Ae201684P_7511.t1	PF01470 Pyroglutamyl peptidase	-SP
Ae201684P_7551.t1	PF00112 Papain family cysteine protease	+SP-TM
Ae201684P_7580.t1	PF07724 AAA domain (Cdc48 subfamily) / PF00004 ATPase family associated with various cellular activities (AAA) / PF10431 C-terminal, D2-small domain, of ClpB protein	-SP
Ae201684P_7631.t1	PF00227 Proteasome subunit	-SP
Ae201684P_7784.t1	PF00675 Insulinase (Peptidase family M16) / PF16187 Middle or third domain of peptidase_M16 / PF05193 Peptidase M16 inactive domain	-SP
Ae201684P_7869.t1	PF01400 Astacin (Peptidase family M12A)	+SP-TM
Ae201684P_8116.t1	PF01088 Ubiquitin carboxyl-terminal hydrolase, family 1	-SP
Ae201684P_8182.t1	PF01432 Peptidase family M3	-SP
Ae201684P_8208.t1	PF00026 Eukaryotic aspartyl protease	-SP
Ae201684P_8222.t1	PF00450 Serine carboxypeptidase	+SP-TM
Ae201684P_8229.t1	PF01435 Peptidase family M48 / PF16491 CAAX prenyl protease N-terminal, five membrane helices	-SP
Ae201684P_8237.t1	PF00246 Zinc carboxypeptidase	-SP
Ae201684P_8313.t1	PF00082 Subtilase family	+SP-TM
Ae201684P_8315.t1	PF00082 Subtilase family	-SP
Ae201684P_8319.t1	PF00112 Papain family cysteine protease	-SP
Ae201684P_8328.t1	PF01694 Rhomboid family	-SP
Ae201684P_8331.t1	PF01694 Rhomboid family	-SP
Ae201684P_8401.t1	PF00734 Fungal cellulose binding domain / PF00112 Papain family cysteine protease	+SP-TM
Ae201684P_8405.t1	PF00112 Papain family cysteine protease	+SP-TM
Ae201684P_8407.t1	PF00734 Fungal cellulose binding domain / PF00112 Papain family cysteine protease	+SP-TM
Ae201684P_8409.t1	PF00112 Papain family cysteine protease	+SP-TM
Ae201684P_8410.t1	PF00188 Cysteine-rich secretory protein family / PF00112 Papain family cysteine protease	+SP-TM
Ae201684P_8411.t1	PF00112 Papain family cysteine protease	-SP
Ae201684P_8412.t1	PF00188 Cysteine-rich secretory protein family / PF00112 Papain family cysteine protease	+SP-TM
Ae201684P_8413.t1	PF00112 Papain family cysteine protease	+SP-TM
Ae201684P_8414.t1	PF00188 Cysteine-rich secretory protein family / PF00112 Papain family cysteine protease	+SP-TM
Ae201684P_8415.t1	PF04886 PT repeat / PF00188 Cysteine-rich secretory protein family / PF00112 Papain family cysteine protease	+SP-TM
Ae201684P_8417.t1	PF00112 Papain family cysteine protease	+SP-TM
Ae201684P_8418.t1	PF00188 Cysteine-rich secretory protein family / PF00112 Papain family cysteine protease	+SP-TM
Ae201684P_8421.t1	PF00112 Papain family cysteine protease	+SP-TM
Ae201684P_8422.t1	PF00112 Papain family cysteine protease	-SP
Ae201684P_8442.t1	PF00082 Subtilase family	-SP
Ae201684P_8564.t1	PF05577 Serine carboxypeptidase S28	+SP-TM
Ae201684P_8573.t1	PF05362 Lon protease (S16) C-terminal proteolytic domain / PF00004 ATPase family associated with various cellular activities (AAA) / PF02190 ATP-dependent protease La (LON) substrate-binding domain	-SP
Ae201684P_8596.t1	PF02902 Ulp1 protease family, C-terminal catalytic domain	-SP
Ae201684P_8643.t1	PF00443 Ubiquitin carboxyl-terminal hydrolase	-SP
Ae201684P_8685.t1	PF06337 DUSP domain / PF00168 C2 domain	-SP
Ae201684P_8685.t2	PF06337 DUSP domain / PF00168 C2 domain	-SP
Ae201684P_8734.t1	PF05577 Serine carboxypeptidase S28	-SP
Ae201684P_8778.t1	PF15801 zf-MYND-like zinc finger, mRNA-binding / PF00557 Metallopeptidase family M24	-SP
Ae201684P_8779.t1	PF15801 zf-MYND-like zinc finger, mRNA-binding / PF00557 Metallopeptidase family M24	-SP
Ae201684P_8807.t1	PF00450 Serine carboxypeptidase	-SP
Ae201684P_8808.t1	PF00450 Serine carboxypeptidase	-SP
Ae201684P_8812.t1	PF09286 Pro-kumamolisin, activation domain	-SP
Ae201684P_8949.t1	PF00246 Zinc carboxypeptidase	+SP-TM
Ae201684P_8989.t1	PF07687 Peptidase dimerisation domain / PF01546 Peptidase family M20/M25/M40	-SP
Ae201684P_9038.t1	PF05577 Serine carboxypeptidase S28	-SP
Ae201684P_9189.t1	PF00078 Reverse transcriptase (RNA-dependent DNA polymerase)	-SP
Ae201684P_9262.t1	PF05362 Lon protease (S16) C-terminal proteolytic domain / PF00004 ATPase family associated with various cellular activities (AAA) / PF02190 ATP-dependent protease La (LON) substrate-binding domain	+SP+TM
Ae201684P_9494.t1	PF00089 Trypsin	+SP-TM
Ae201684P_9496.t1	PF00089 Trypsin	+SP-TM
Ae201684P_9566.t1	PF01433 Peptidase family M1 domain	-SP
Ae201684P_9623.t1	PF00883 Cytosol aminopeptidase family, catalytic domain	-SP
Ae201684P_9647.t1	PF00883 Cytosol aminopeptidase family, catalytic domain	-SP
Ae201684P_9846.t1	PF02225 PA domain / PF04258 Signal peptide peptidase	-SP
Ae201684P_9941.t1	PF06337 DUSP domain / PF00443 Ubiquitin carboxyl-terminal hydrolase	-SP
Ae201684P_9977.t1	PF02902 Ulp1 protease family, C-terminal catalytic domain	-SP
Ae201684P_10030.t1	PF00443 Ubiquitin carboxyl-terminal hydrolase	-SP
Ae201684P_10105.t1	PF00443 Ubiquitin carboxyl-terminal hydrolase / PF02148 Zn-finger in ubiquitin-hydrolases and other protein	-SP
Ae201684P_10197.t1	PF02225 PA domain / PF04258 Signal peptide peptidase	-SP
Ae201684P_10206.t1	PF13365 Trypsin-like peptidase domain / PF12812 PDZ-like domain	-SP
Ae201684P_10253.t1	PF01398 JAB1/Mov34/MPN/PAD-1 ubiquitin protease / PF00855 PWWP domain	-SP
Ae201684P_10310.t1	PF00004 ATPase family associated with various cellular activities (AAA) / PF01434 Peptidase family M41	-SP
Ae201684P_10344.t1	PF01433 Peptidase family M1 domain / PF17432 Domain of unknown function (DUF3458_C) ARM repeats / PF11940 Domain of unknown function (DUF3458) Ig-like fold	-SP
Ae201684P_10407.t1	PF00443 Ubiquitin carboxyl-terminal hydrolase	-SP
Ae201684P_10443.t1	PF01694 Rhomboid family	-SP
Ae201684P_10592.t1	PF00717 Peptidase S24-like	-SP
Ae201684P_10763.t1	PF00443 Ubiquitin carboxyl-terminal hydrolase	-SP
Ae201684P_10774.t1	PF00443 Ubiquitin carboxyl-terminal hydrolase	-SP
Ae201684P_11065.t1	PF13650 Aspartyl protease / PF00078 Reverse transcriptase (RNA-dependent DNA polymerase)	-SP
Ae201684P_11494.t1	PF00082 Subtilase family	-SP
Ae201684P_11852.t1	PF00574 Clp protease	-SP
Ae201684P_11934.t1	PF00443 Ubiquitin carboxyl-terminal hydrolase	-SP
Ae201684P_11946.t1	PF05649 Peptidase family M13 / PF01431 Peptidase family M13	-SP
Ae201684P_11948.t1	PF00443 Ubiquitin carboxyl-terminal hydrolase	-SP
Ae201684P_12153.t1	PF13367 Protease prsW family	-SP
Ae201684P_12194.t1	PF00082 Subtilase family	+SP-TM
Ae201684P_12195.t1	PF00082 Subtilase family	+SP-TM
Ae201684P_12401.t1	PF10502 Signal peptidase, peptidase S26 / PF00717 Peptidase S24-like	-SP
Ae201684P_12432.t1	PF10502 Signal peptidase, peptidase S26 / PF00717 Peptidase S24-like	-SP
Ae201684P_12449.t1	PF01067 Calpain large subunit, domain III / PF00648 Calpain family cysteine protease	-SP
Ae201684P_12449.t2	PF01067 Calpain large subunit, domain III / PF00648 Calpain family cysteine protease	-SP
Ae201684P_12449.t3	PF01067 Calpain large subunit, domain III / PF00648 Calpain family cysteine protease	-SP
Ae201684P_12449.t4	PF01067 Calpain large subunit, domain III / PF00648 Calpain family cysteine protease	-SP
Ae201684P_12587.t1	PF00930 Dipeptidyl peptidase IV (DPP IV) N-terminal region / PF00326 Prolyl oligopeptidase family	-SP
Ae201684P_12651.t1	PF00443 Ubiquitin carboxyl-terminal hydrolase	-SP
Ae201684P_12655.t1	PF08246 Cathepsin propeptide inhibitor domain (I29) / PF00112 Papain family cysteine protease	-SP
Ae201684P_12656.t1	PF00026 Eukaryotic aspartyl protease	-SP
Ae201684P_12779.t1	PF01400 Astacin (Peptidase family M12A)	+SP-TM
Ae201684P_12781.t1	PF00246 Zinc carboxypeptidase	-SP
Ae201684P_12838.t1	PF00089 Trypsin	+SP-TM
Ae201684P_12839.t1	PF00089 Trypsin	+SP-TM
Ae201684P_12840.t1	PF00089 Trypsin	-SP
Ae201684P_12841.t1	PF00089 Trypsin	+SP-TM
Ae201684P_13017.t1	PF00082 Subtilase family	+SP-TM
Ae201684P_13018.t1	PF00082 Subtilase family	+SP-TM
Ae201684P_13019.t1	PF00082 Subtilase family	+SP-TM
Ae201684P_13020.t1	PF00082 Subtilase family	+SP-TM
Ae201684P_13026.t1	PF00082 Subtilase family	+SP-TM
Ae201684P_13027.t1	PF00082 Subtilase family	+SP-TM
Ae201684P_13030.t1	PF00082 Subtilase family	+SP-TM
Ae201684P_13031.t1	PF00082 Subtilase family	+SP-TM
Ae201684P_13033.t1	PF00082 Subtilase family	-SP
Ae201684P_13035.t1	PF00082 Subtilase family	+SP-TM
Ae201684P_13039.t1	PF00082 Subtilase family	-SP
Ae201684P_13041.t1	PF00082 Subtilase family	+SP-TM
Ae201684P_13042.t1	PF00082 Subtilase family	+SP-TM
Ae201684P_13096.t1	PF03577 Peptidase family C69	-SP
Ae201684P_13097.t1	PF03577 Peptidase family C69	-SP
Ae201684P_13100.t1	PF03577 Peptidase family C69	-SP
Ae201684P_13180.t1	PF01435 Peptidase family M48	-SP
Ae201684P_13313.t1	PF00227 Proteasome subunit	-SP
Ae201684P_13490.t1	PF00450 Serine carboxypeptidase	-SP
Ae201684P_13575.t1	PF01435 Peptidase family M48	-SP
Ae201684P_13676.t1	PF11838 ERAP1-like C-terminal domain / PF01433 Peptidase family M1 domain	-SP
Ae201684P_13677.t1	PF11838 ERAP1-like C-terminal domain / PF01433 Peptidase family M1 domain	-SP
Ae201684P_13725.t1	PF00078 Reverse transcriptase (RNA-dependent DNA polymerase) / PF00665 Integrase core domain / PF13975 gag-polyprotein putative aspartyl protease	-SP
Ae201684P_13774.t1	PF00026 Eukaryotic aspartyl protease	-SP
Ae201684P_13778.t1	PF00026 Eukaryotic aspartyl protease	-SP
Ae201684P_13786.t1	PF14543 Xylanase inhibitor N-terminal / PF14541 Xylanase inhibitor C-terminal	-SP
Ae201684P_13798.t1	PF00246 Zinc carboxypeptidase	-SP
Ae201684P_13995.t1	PF02148 Zn-finger in ubiquitin-hydrolases and other protein / PF00443 Ubiquitin carboxyl-terminal hydrolase	-SP
Ae201684P_14069.t1	PF13365 Trypsin-like peptidase domain / PF13180 PDZ domain / PF12812 PDZ-like domain	-SP
Ae201684P_14158.t1	PF00246 Zinc carboxypeptidase	+SP-TM
Ae201684P_14269.t1	PF00227 Proteasome subunit / PF00892 EamA-like transporter family / PF10584 Proteasome subunit A N-terminal signature	-SP
Ae201684P_14318.t1	PF00443 Ubiquitin carboxyl-terminal hydrolase / PF00240 Ubiquitin family	-SP
Ae201684P_14321.t1	PF00227 Proteasome subunit / PF10584 Proteasome subunit A N-terminal signature	-SP
Ae201684P_14339.t1	PF00082 Subtilase family	-SP
Ae201684P_14358.t1	PF03577 Peptidase family C69	-SP
Ae201684P_14381.t1	PF00450 Serine carboxypeptidase	-SP
Ae201684P_14428.t1	PF00443 Ubiquitin carboxyl-terminal hydrolase	-SP
Ae201684P_14430.t1	PF00443 Ubiquitin carboxyl-terminal hydrolase	-SP
Ae201684P_14461.t1	PF00450 Serine carboxypeptidase	-SP
Ae201684P_14471.t1	PF00450 Serine carboxypeptidase	-SP
Ae201684P_14472.t1	PF00082 Subtilase family	+SP-TM
Ae201684P_14474.t1	PF00450 Serine carboxypeptidase	-SP
Ae201684P_14477.t1	PF00450 Serine carboxypeptidase	-SP
Ae201684P_14478.t1	PF00450 Serine carboxypeptidase	-SP
Ae201684P_14487.t1	PF00450 Serine carboxypeptidase	-SP
Ae201684P_14498.t1	PF00675 Insulinase (Peptidase family M16) / PF16187 Middle or third domain of peptidase_M16 / PF05193 Peptidase M16 inactive domain	-SP
Ae201684P_14620.t1	PF02099 Josephin	-SP
Ae201684P_14772.t1	PF00078 Reverse transcriptase (RNA-dependent DNA polymerase)	-SP
Ae201684P_14775.t1	PF00078 Reverse transcriptase (RNA-dependent DNA polymerase)	-SP
Ae201684P_14778.t1	PF00078 Reverse transcriptase (RNA-dependent DNA polymerase)	+SP+TM
Ae201684P_14966.t1	PF08246 Cathepsin propeptide inhibitor domain (I29) / PF00112 Papain family cysteine protease	+SP-TM
Ae201684P_14993.t1	PF00008 EGF-like domain / PF07974 EGF-like domain / PF01457 Leishmanolysin	-SP
Ae201684P_15005.t1	PF00450 Serine carboxypeptidase	-SP
Ae201684P_15015.t1	PF01457 Leishmanolysin	+SP-TM
Ae201684P_15125.t1	PF00078 Reverse transcriptase (RNA-dependent DNA polymerase) / PF13975 gag-polyprotein putative aspartyl protease	-SP
Ae201684P_15240.t1	PF00443 Ubiquitin carboxyl-terminal hydrolase	-SP
Ae201684P_15266.t1	PF01067 Calpain large subunit, domain III / PF00648 Calpain family cysteine protease	-SP
Ae201684P_15296.t1	PF00082 Subtilase family	-SP
Ae201684P_15317.t1	PF00082 Subtilase family	-SP
Ae201684P_15318.t1	PF00082 Subtilase family	-SP
Ae201684P_15319.t1	PF00082 Subtilase family	-SP
Ae201684P_15320.t1	PF00082 Subtilase family	+SP-TM
Ae201684P_15322.t1	PF00082 Subtilase family	+SP-TM
Ae201684P_15361.t1	PF00648 Calpain family cysteine protease	-SP
Ae201684P_15480.t1	PF02338 OTU-like cysteine protease	-SP
Ae201684P_15481.t1	PF00227 Proteasome subunit / PF10584 Proteasome subunit A N-terminal signature	-SP
Ae201684P_15565.t1	PF00227 Proteasome subunit / PF10584 Proteasome subunit A N-terminal signature	+SP+TM
Ae201684P_15628.t1	PF14295 PAN domain / PF00150 Cellulase (glycosyl hydrolase family 5) / PF00112 Papain family cysteine protease	+SP-TM
Ae201684P_15630.t1	PF14295 PAN domain / PF00112 Papain family cysteine protease	+SP-TM
Ae201684P_15633.t2	PF14295 PAN domain / PF00112 Papain family cysteine protease	+SP-TM
Ae201684P_15636.t1	PF14295 PAN domain / PF00112 Papain family cysteine protease	+SP-TM
Ae201684P_15637.t1	PF14295 PAN domain / PF00112 Papain family cysteine protease	+SP-TM
Ae201684P_15650.t1	PF13650 Aspartyl protease / PF00078 Reverse transcriptase (RNA-dependent DNA polymerase)	-SP
Ae201684P_15650.t2	PF13650 Aspartyl protease / PF00078 Reverse transcriptase (RNA-dependent DNA polymerase) / PF00665 Integrase core domain / PF13456 Reverse transcriptase-like	-SP
Ae201684P_15650.t3	PF13650 Aspartyl protease / PF00078 Reverse transcriptase (RNA-dependent DNA polymerase)	-SP
Ae201684P_15788.t1	PF01088 Ubiquitin carboxyl-terminal hydrolase, family 1	-SP
Ae201684P_15847.t1	PF16189 Creatinase/Prolidase N-terminal domain / PF16188 C-terminal region of peptidase_M24 / PF01321 Creatinase/Prolidase N-terminal domain / PF00557 Metallopeptidase family M24	-SP
Ae201684P_15867.t1	PF00326 Prolyl oligopeptidase family	-SP
Ae201684P_16056.t1	PF00227 Proteasome subunit	-SP
Ae201684P_16142.t1	PF03577 Peptidase family C69	-SP
Ae201684P_16243.t1	PF00557 Metallopeptidase family M24	-SP
Ae201684P_16477.t1	PF06337 DUSP domain / PF00443 Ubiquitin carboxyl-terminal hydrolase	-SP
Ae201684P_16507.t1	PF01400 Astacin (Peptidase family M12A)	+SP-TM
Ae201684P_16508.t1	PF01400 Astacin (Peptidase family M12A)	+SP-TM
Ae201684P_16509.t1	PF01400 Astacin (Peptidase family M12A)	+SP-TM
Ae201684P_16530.t1	PF02127 Aminopeptidase I zinc metalloprotease (M18)	-SP
Ae201684P_16576.t1	PF06645 Microsomal signal peptidase 12 kDa subunit (SPC12)	-SP
Ae201684P_16613.t1	PF01088 Ubiquitin carboxyl-terminal hydrolase, family 1	-SP
Ae201684P_16614.t1	PF01088 Ubiquitin carboxyl-terminal hydrolase, family 1	-SP
Ae201684P_16682.t1	PF06337 DUSP domain / PF01363 FYVE zinc finger	-SP
Ae201684P_16779.t1	PF00561 alpha/beta hydrolase fold	-SP
Ae201684P_16844.t1	PF08246 Cathepsin propeptide inhibitor domain (I29) / PF00112 Papain family cysteine protease	+SP-TM
Ae201684P_16861.t1	PF00026 Eukaryotic aspartyl protease	-SP
Ae201684P_16882.t1	PF00443 Ubiquitin carboxyl-terminal hydrolase / PF00642 Zinc finger C-x8-C-x5-C-x3-H type (and similar)	-SP
Ae201684P_17000.t1	PF05577 Serine carboxypeptidase S28	+SP-TM
Ae201684P_17001.t1	PF05577 Serine carboxypeptidase S28	+SP-TM
Ae201684P_17011.t1	PF05577 Serine carboxypeptidase S28	+SP-TM
Ae201684P_17014.t1	PF05577 Serine carboxypeptidase S28	+SP-TM
Ae201684P_17016.t1	PF05577 Serine carboxypeptidase S28	-SP
Ae201684P_17025.t1	PF05577 Serine carboxypeptidase S28	+SP-TM
Ae201684P_17029.t1	PF00078 Reverse transcriptase (RNA-dependent DNA polymerase)	-SP
Ae201684P_17029.t2	PF00078 Reverse transcriptase (RNA-dependent DNA polymerase)	-SP
Ae201684P_17030.t1	PF05577 Serine carboxypeptidase S28	-SP
Ae201684P_17031.t1	PF05577 Serine carboxypeptidase S28	-SP
Ae201684P_17177.t1	PF05577 Serine carboxypeptidase S28	+SP+TM
Ae201684P_17254.t1	PF00443 Ubiquitin carboxyl-terminal hydrolase	-SP
Ae201684P_17290.t1	PF07724 AAA domain (Cdc48 subfamily) / PF00004 ATPase family associated with various cellular activities (AAA)	-SP
Ae201684P_17352.t1	PF00227 Proteasome subunit	-SP
Ae201684P_17364.t1	PF03577 Peptidase family C69	+SP-TM
Ae201684P_17365.t1	PF03577 Peptidase family C69	-SP
Ae201684P_17366.t1	PF03577 Peptidase family C69	-SP
Ae201684P_17367.t1	PF03577 Peptidase family C69	-SP
Ae201684P_17368.t1	PF03577 Peptidase family C69	-SP
Ae201684P_17423.t1	PF01435 Peptidase family M48	-SP
Ae201684P_17486.t1	PF00112 Papain family cysteine protease	-SP
Ae201684P_17573.t1	PF00078 Reverse transcriptase (RNA-dependent DNA polymerase)	-SP
Ae201684P_17577.t1	PF06337 DUSP domain	-SP
Ae201684P_17618.t1	PF00089 Trypsin	+SP-TM
Ae201684P_17619.t1	PF00089 Trypsin	-SP
Ae201684P_17620.t1	PF00089 Trypsin	-SP
Ae201684P_17621.t1	PF00089 Trypsin	+SP-TM
Ae201684P_17622.t1	PF00089 Trypsin	+SP-TM
Ae201684P_17623.t1	PF00089 Trypsin	+SP-TM
Ae201684P_17624.t1	PF00089 Trypsin	+SP-TM
Ae201684P_17627.t1	PF00089 Trypsin	-SP
Ae201684P_17629.t1	PF00089 Trypsin	-SP
Ae201684P_17631.t1	PF00089 Trypsin	-SP
Ae201684P_17632.t1	PF00089 Trypsin	-SP
Ae201684P_17633.t1	PF00089 Trypsin	+SP-TM
Ae201684P_17635.t1	PF00089 Trypsin	+SP-TM
Ae201684P_17636.t1	PF00089 Trypsin	+SP-TM
Ae201684P_17637.t1	PF00089 Trypsin	-SP
Ae201684P_17638.t1	PF00089 Trypsin	-SP
Ae201684P_17685.t1	PF00648 Calpain family cysteine protease	-SP
Ae201684P_17713.t1	PF01400 Astacin (Peptidase family M12A)	-SP
Ae201684P_17747.t1	PF00443 Ubiquitin carboxyl-terminal hydrolase	-SP
Ae201684P_17831.t1	PF00089 Trypsin	-SP
Ae201684P_17832.t1	PF00089 Trypsin	+SP-TM
Ae201684P_17833.t1	PF00089 Trypsin	-SP
Ae201684P_17834.t1	PF00089 Trypsin	-SP
Ae201684P_17835.t1	PF00089 Trypsin	-SP
Ae201684P_17837.t1	PF00089 Trypsin	+SP-TM
Ae201684P_17838.t1	PF00089 Trypsin	-SP
Ae201684P_17839.t1	PF00089 Trypsin	-SP
Ae201684P_17841.t1	PF00089 Trypsin	-SP
Ae201684P_17849.t1	PF00112 Papain family cysteine protease	+SP-TM
Ae201684P_17893.t1	PF00717 Peptidase S24-like	-SP
Ae201684P_17894.t1	PF00717 Peptidase S24-like	-SP
Ae201684P_17909.t1	PF13650 Aspartyl protease / PF00078 Reverse transcriptase (RNA-dependent DNA polymerase)	-SP
Ae201684P_17937.t1	PF00078 Reverse transcriptase (RNA-dependent DNA polymerase)	-SP
Ae201684P_17958.t1	PF05577 Serine carboxypeptidase S28	+SP-TM
Ae201684P_17961.t1	PF05577 Serine carboxypeptidase S28	+SP-TM
Ae201684P_17981.t1	PF05577 Serine carboxypeptidase S28	+SP-TM
Ae201684P_18098.t1	PF00089 Trypsin	+SP-TM
Ae201684P_18099.t1	PF00089 Trypsin	+SP-TM
Ae201684P_18121.t1	PF00089 Trypsin	+SP-TM
Ae201684P_18122.t1	PF00089 Trypsin	+SP-TM
Ae201684P_18134.t1	PF00089 Trypsin	+SP-TM
Ae201684P_18136.t1	PF00089 Trypsin	+SP-TM
Ae201684P_18137.t1	PF00089 Trypsin	-SP
Ae201684P_18138.t1	PF00089 Trypsin	+SP-TM
Ae201684P_18142.t1	PF00089 Trypsin	+SP-TM
Ae201684P_18143.t1	PF00089 Trypsin	+SP-TM
Ae201684P_18148.t1	PF00089 Trypsin	+SP-TM
Ae201684P_18149.t1	PF00089 Trypsin	+SP-TM
Ae201684P_18153.t1	PF00089 Trypsin	+SP-TM
Ae201684P_18171.t1	PF00089 Trypsin	-SP
Ae201684P_18184.t1	PF00089 Trypsin	+SP-TM
Ae201684P_18189.t1	PF00089 Trypsin	+SP-TM
Ae201684P_18190.t1	PF00089 Trypsin	+SP-TM
Ae201684P_18191.t1	PF00089 Trypsin	+SP-TM
Ae201684P_18192.t1	PF00089 Trypsin	+SP-TM
Ae201684P_18193.t1	PF00246 Zinc carboxypeptidase	-SP
Ae201684P_18193.t2	PF00246 Zinc carboxypeptidase	+SP-TM
Ae201684P_18195.t1	PF00089 Trypsin	+SP-TM
Ae201684P_18196.t1	PF00089 Trypsin	+SP-TM
Ae201684P_18198.t1	PF00246 Zinc carboxypeptidase	+SP-TM
Ae201684P_18198.t2	PF00246 Zinc carboxypeptidase	+SP-TM
Ae201684P_18199.t1	PF00089 Trypsin	+SP-TM
Ae201684P_18202.t1	PF00089 Trypsin	-SP
Ae201684P_18203.t1	PF00089 Trypsin	-SP
Ae201684P_18208.t1	PF00089 Trypsin	-SP
Ae201684P_18209.t1	PF00089 Trypsin	-SP
Ae201684P_18213.t1	PF00089 Trypsin	+SP-TM
Ae201684P_18217.t1	PF00089 Trypsin	-SP
Ae201684P_18227.t1	PF00089 Trypsin	+SP-TM
Ae201684P_18229.t1	PF00089 Trypsin	-SP
Ae201684P_18230.t1	PF00089 Trypsin	+SP-TM
Ae201684P_18232.t1	PF00089 Trypsin	+SP-TM
Ae201684P_18235.t1	PF00089 Trypsin	+SP-TM
Ae201684P_18240.t1	PF00089 Trypsin	+SP-TM
Ae201684P_18241.t1	PF00089 Trypsin	+SP-TM
Ae201684P_18242.t1	PF00089 Trypsin	+SP-TM
Ae201684P_18243.t1	PF00089 Trypsin	-SP
Ae201684P_18244.t1	PF00089 Trypsin	-SP
Ae201684P_18245.t1	PF00089 Trypsin	-SP
Ae201684P_18246.t1	PF00089 Trypsin	-SP
Ae201684P_18247.t1	PF00089 Trypsin	-SP
Ae201684P_18248.t1	PF00089 Trypsin	+SP-TM
Ae201684P_18249.t1	PF00082 Subtilase family	-SP
Ae201684P_18250.t1	PF00082 Subtilase family	-SP
Ae201684P_18250.t2	PF00082 Subtilase family	+SP-TM
Ae201684P_18258.t1	PF00665 Integrase core domain / PF00385 Chromo (CHRromatin Organisation MOdifier) domain	-SP
Ae201684P_18278.t1	PF00089 Trypsin	+SP-TM
Ae201684P_18288.t1	PF00246 Zinc carboxypeptidase	+SP-TM
Ae201684P_18290.t1	PF00246 Zinc carboxypeptidase	+SP-TM
Ae201684P_18291.t1	PF00246 Zinc carboxypeptidase	+SP-TM
Ae201684P_18292.t1	PF00246 Zinc carboxypeptidase	+SP-TM
Ae201684P_18293.t1	PF00246 Zinc carboxypeptidase	+SP-TM
Ae201684P_18294.t1	PF00246 Zinc carboxypeptidase	+SP-TM
Ae201684P_18296.t1	PF00246 Zinc carboxypeptidase	+SP-TM
Ae201684P_18298.t1	PF01427 D-ala-D-ala dipeptidase	-SP
Ae201684P_18304.t1	PF00246 Zinc carboxypeptidase	+SP-TM
Ae201684P_18417.t1	PF09768 Peptidase M76 family	-SP
Ae201684P_18503.t1	PF00648 Calpain family cysteine protease	-SP
Ae201684P_18544.t1	PF05577 Serine carboxypeptidase S28	+SP-TM
Ae201684P_18618.t1	PF00443 Ubiquitin carboxyl-terminal hydrolase / PF00627 UBA/TS-N domain	-SP
Ae201684P_18709.t1	PF05649 Peptidase family M13 / PF01431 Peptidase family M13	-SP
Ae201684P_18852.t1	PF09127 Leukotriene A4 hydrolase, C-terminal / PF01433 Peptidase family M1 domain	-SP
Ae201684P_18854.t1	PF09127 Leukotriene A4 hydrolase, C-terminal / PF01433 Peptidase family M1 domain	-SP
Ae201684P_18884.t1	PF01650 Peptidase C13 family	+SP-TM
Ae201684P_18997.t1	PF05577 Serine carboxypeptidase S28	+SP-TM
Ae201684P_18998.t1	PF05577 Serine carboxypeptidase S28	+SP-TM
Ae201684P_18999.t1	PF05577 Serine carboxypeptidase S28	+SP-TM
Ae201684P_19096.t1	PF06337 DUSP domain / PF01753 MYND finger / PF00443 Ubiquitin carboxyl-terminal hydrolase	-SP
Ae201684P_19115.t1	PF02897 Prolyl oligopeptidase, N-terminal beta-propeller domain / PF00326 Prolyl oligopeptidase family	-SP
Ae201684P_19118.t1	PF02897 Prolyl oligopeptidase, N-terminal beta-propeller domain / PF00326 Prolyl oligopeptidase family	-SP
Ae201684P_19127.t1	PF00112 Papain family cysteine protease	+SP-TM
Ae201684P_19215.t1	PF00082 Subtilase family	+SP-TM
Ae201684P_19432.t1	PF00246 Zinc carboxypeptidase / PF00722 Glycosyl hydrolases family 16	-SP
Ae201684P_19600.t1	PF00450 Serine carboxypeptidase	-SP
Ae201684P_20031.t1	PF00443 Ubiquitin carboxyl-terminal hydrolase / PF12436 ICP0-binding domain of Ubiquitin-specific protease 7 / PF14533 Ubiquitin-specific protease C-terminal	-SP
Ae201684P_20136.t1	PF02902 Ulp1 protease family, C-terminal catalytic domain	-SP
Ae201684P_20177.t1	PF14295 PAN domain / PF00082 Subtilase family	+SP-TM
Ae201684P_20178.t1	PF14295 PAN domain / PF00082 Subtilase family	+SP-TM
Ae201684P_20179.t1	PF00082 Subtilase family	+SP-TM
Ae201684P_20368.t1	PF00883 Cytosol aminopeptidase family, catalytic domain / PF02789 Cytosol aminopeptidase family, N-terminal domain	-SP
Ae201684P_20369.t1	PF02789 Cytosol aminopeptidase family, N-terminal domain / PF00883 Cytosol aminopeptidase family, catalytic domain	-SP
Ae201684P_20420.t1	PF13365 Trypsin-like peptidase domain / PF13180 PDZ domain	-SP
Ae201684P_20583.t1	PF13365 Trypsin-like peptidase domain / PF00595 PDZ domain (Also known as DHR or GLGF) / PF12812 PDZ-like domain	-SP
Ae201684P_20653.t1	PF02902 Ulp1 protease family, C-terminal catalytic domain / PF00069 Protein kinase domain	-SP
Ae201684P_20944.t1	PF04424 MINDY deubiquitinase	-SP
Ae201684P_21158.t1	PF00443 Ubiquitin carboxyl-terminal hydrolase	-SP
Ae201684P_21184.t1	PF00026 Eukaryotic aspartyl protease	-SP
Ae201684P_21230.t1	PF09286 Pro-kumamolisin, activation domain / PF00082 Subtilase family	+SP-TM
Ae201684P_21258.t1	PF00227 Proteasome subunit / PF10584 Proteasome subunit A N-terminal signature	-SP
Ae201684P_21398.t1	PF05195 Aminopeptidase P, N-terminal domain / PF00557 Metallopeptidase family M24	-SP
Ae201684P_21405.t1	PF07722 Peptidase C26	-SP
Ae201684P_21526.t1	PF13499 EF-hand domain pair / PF01067 Calpain large subunit, domain III / PF13833 EF-hand domain pair / PF00397 WW domain / PF00648 Calpain family cysteine protease	-SP
Ae201684P_21526.t2	PF13499 EF-hand domain pair / PF01067 Calpain large subunit, domain III / PF13833 EF-hand domain pair / PF00648 Calpain family cysteine protease / PF00397 WW domain	-SP
Ae201684P_21552.t1	PF00443 Ubiquitin carboxyl-terminal hydrolase	-SP
Ae201684P_21556.t1	PF00665 Integrase core domain / PF00385 Chromo (CHRromatin Organisation MOdifier) domain	-SP
Ae201684P_21663.t1	PF00082 Subtilase family	+SP-TM
Ae201684P_22110.t1	PF00026 Eukaryotic aspartyl protease	+SP-TM
Ae201684P_22251.t1	PF01457 Leishmanolysin	+SP-TM
Ae201684P_22252.t1	PF01457 Leishmanolysin	+SP-TM
Ae201684P_22253.t1	PF01457 Leishmanolysin	+SP-TM
Ae201684P_22254.t1	PF07974 EGF-like domain / PF01457 Leishmanolysin	+SP-TM
Ae201684P_22328.t1	PF01432 Peptidase family M3	-SP
Ae201684P_22453.t1	PF00450 Serine carboxypeptidase	-SP
Ae201684P_22511.t1	PF00443 Ubiquitin carboxyl-terminal hydrolase	+SP+TM

## Sheet: ST S2 Secreted nonSecreted
ST S2 : Distribution of secreted and non-secreted peptidases within A. euteiches genome
Pfam	Nb of Secreted	Nb of Non-secreted
PF02129 X-Pro dipeptidyl-peptidase; S15	1	1
PF01650 Peptidase C13	1	1
PF01457 Leishmanolysin; M8	5	1
PF01400 Astacin; M12A	5	1
PF06337 DUSP domain; C19	0	11
PF00026 Eukaryotic aspartyl protease; A1	2	10
PF00648 Calpain family cysteine protease; C2	0	12
PF03577 Peptidase family C69	1	13
PF00227 Proteasome subunit; T1	0	15
PF01432 Peptidase family M3	0	18
PF00246 Zinc carboxypeptidase; M14	13	8
PF01431/PF05649 Peptidase family M13	8	13
PF05577 Serine carboxypeptidase; S28	14	10
PF00450 Serine carboxypeptidase; S10	1	31
PF00443 Ubiquitin carboxyl-terminal hydrolase; C67/C19	0	32
PF00112 Papain family cysteine protease; C1A	27	10
PF00082 Subtilase family; S8/S53	28	17
PF00089 Trypsin; S1	45	29

## Sheet: ST S3 MCL
ST S3 : Proteases are tandemly repeated in the genome of Aphanomyces euteiches
ID number are related to AphanoDB database
Modular proteases color code
PF14295 PAN domain
PF02221 ML domain
PF00734 Fungal cellulose binding domain (CBM1)
PF00188 Cysteine-rich secretory protein family
Trypsin; S1	Tandem Repeat (TR)	Papain; C1A	Tandem Repeat (TR)	Subtilase; S8/S53	Tandem Repeat (TR)	Serine carboxypeptidase; S28	Tandem Repeat (TR)	Zinc carboxypeptidase; M14	Tandem Repeat (TR)	Peptidase M13	Tandem Repeat (TR)	Leishmanolysin; M8	Tandem Repeat (TR)	Trypsin; S1	Tandem Repeat (TR)	Astacin; M12	Tandem Repeat (TR)	Subtilase + procumanolysin	Tandem Repeat (TR)	Nonclassified singletones
Ae201684P_9494		Ae201684P_881		Ae201684P_3622		Ae201684P_4425		Ae201684P_8949		Ae201684P_2485		Ae201684P_15015		Ae201684P_17618		Ae201684P_12779		Ae201684P_4608		Ae201684P_3583
Ae201684P_12838	TR	Ae201684P_3220		Ae201684P_3656		Ae201684P_8564		Ae201684P_14158		Ae201684P_2515		Ae201684P_22251	TR	Ae201684P_17622		Ae201684P_16507	TR	Ae201684P_21230		Ae201684P_5765
Ae201684P_12839	TR	Ae201684P_4615	TR	Ae201684P_8313		Ae201684P_17000	TR	Ae201684P_18193		Ae201684P_2526		Ae201684P_22252	TR	Ae201684P_17624		Ae201684P_16508	TR			Ae201684P_5879
Ae201684P_12841		Ae201684P_4616	TR	Ae201684P_12194	TR	Ae201684P_17001	TR	Ae201684P_18198		Ae201684P_7336		Ae201684P_22253	TR	Ae201684P_17633		Ae201684P_16509	TR			Ae201684P_5903
Ae201684P_17621		Ae201684P_7509		Ae201684P_12195	TR	Ae201684P_17011		Ae201684P_18288		Ae201684P_7338		Ae201684P_22254	TR	Ae201684P_17635	TR					Ae201684P_7551
Ae201684P_17623		Ae201684P_8401		Ae201684P_13017	TR	Ae201684P_17014		Ae201684P_18290	TR	Ae201684P_7340				Ae201684P_17636	TR					Ae201684P_7869
Ae201684P_17837		Ae201684P_8405		Ae201684P_13018	TR	Ae201684P_17025		Ae201684P_18291	TR	Ae201684P_7343				Ae201684P_17832						Ae201684P_8222
Ae201684P_18098	TR	Ae201684P_8407		Ae201684P_13019	TR	Ae201684P_17958		Ae201684P_18292	TR	Ae201684P_7345										Ae201684P_9496
Ae201684P_18099	TR	Ae201684P_8409	TR	Ae201684P_13020	TR	Ae201684P_17961		Ae201684P_18293	TR											Ae201684P_17364
Ae201684P_18121	TR	Ae201684P_8410	TR	Ae201684P_13026	TR	Ae201684P_17981		Ae201684P_18294	TR											Ae201684P_18884
Ae201684P_18122	TR	Ae201684P_8412	TR	Ae201684P_13027	TR	Ae201684P_18544		Ae201684P_18296												Ae201684P_21663
Ae201684P_18134		Ae201684P_8413	TR	Ae201684P_13030	TR	Ae201684P_18997	TR	Ae201684P_18304												Ae201684P_22110
Ae201684P_18136		Ae201684P_8414	TR	Ae201684P_13031	TR	Ae201684P_18998	TR
Ae201684P_18138		Ae201684P_8415	TR	Ae201684P_13035		Ae201684P_18999	TR
Ae201684P_18142	TR	Ae201684P_8417	TR	Ae201684P_13041	TR
Ae201684P_18143	TR	Ae201684P_8418	TR	Ae201684P_13042	TR
Ae201684P_18148	TR	Ae201684P_8421		Ae201684P_14472
Ae201684P_18149	TR	Ae201684P_14966		Ae201684P_15320
Ae201684P_18153		Ae201684P_15628		Ae201684P_15322
Ae201684P_18184		Ae201684P_15630		Ae201684P_18250
Ae201684P_18189	TR	Ae201684P_15633		Ae201684P_19215
Ae201684P_18190	TR	Ae201684P_15636	TR	Ae201684P_20177	TR
Ae201684P_18191	TR	Ae201684P_15637	TR	Ae201684P_20178	TR
Ae201684P_18192	TR	Ae201684P_16844		Ae201684P_20179
Ae201684P_18195	TR	Ae201684P_17849
Ae201684P_18196	TR	Ae201684P_19127
Ae201684P_18199
Ae201684P_18213
Ae201684P_18227
Ae201684P_18230
Ae201684P_18232
Ae201684P_18235
Ae201684P_18240	TR
Ae201684P_18241	TR
Ae201684P_18242	TR
Ae201684P_18248
Ae201684P_18278

## Sheet: ST S4 protease cluster
ST S4 : Description of a 97 kb region of A. euteiches genome having tandemly repeated secreted subltilase
A 97 kb genome region, between Ae201684P_13017 and Ae201684P_13042 genes, in a 2,7 Mb genome region of ATCC201684 strain is illustrated (based on AphanoDB data)
SP = signal peptide | TM = transmembrane region
ID number are related to AphanoDB database
ID*	length (AA)	blast annotation	Pfam	IPR	GO	SP/TM predictions
Ae201684P_13017.1	467	RHY69062.1 hypothetical protein DYB38_007645, partial [Aphanomyces astaci] RHZ13450.1 hypothetical protein DYB31_007572 [Aphanomyces astaci] RHZ29242.1 hypothetical protein DYB26_007569 [Aphanomyces astaci] RLO02715.1 hypothetical protein DYB28_013813 [Aphanomyces astaci]	PF00082 Subtilase family	IPR000209 Peptidase S8/S53 domain	GO:0004252 serine-type endopeptidase activity / GO:0006508 proteolysis	+SP-TM	1
Ae201684P_13018.1	485	RHY69062.1 hypothetical protein DYB38_007645, partial [Aphanomyces astaci] RHZ13450.1 hypothetical protein DYB31_007572 [Aphanomyces astaci] RHZ29242.1 hypothetical protein DYB26_007569 [Aphanomyces astaci] RLO02715.1 hypothetical protein DYB28_013813 [Aphanomyces astaci]	PF00082 Subtilase family	IPR000209 Peptidase S8/S53 domain	GO:0004252 serine-type endopeptidase activity / GO:0006508 proteolysis	+SP-TM	2
Ae201684P_13019.1	465	RHY69062.1 hypothetical protein DYB38_007645, partial [Aphanomyces astaci] RHZ13450.1 hypothetical protein DYB31_007572 [Aphanomyces astaci] RHZ29242.1 hypothetical protein DYB26_007569 [Aphanomyces astaci] RLO02715.1 hypothetical protein DYB28_013813 [Aphanomyces astaci]	PF00082 Subtilase family	IPR000209 Peptidase S8/S53 domain	GO:0004252 serine-type endopeptidase activity / GO:0006508 proteolysis	+SP-TM	3
Ae201684P_13020.1	484	RHY69062.1 hypothetical protein DYB38_007645, partial [Aphanomyces astaci] RHZ13450.1 hypothetical protein DYB31_007572 [Aphanomyces astaci] RHZ29242.1 hypothetical protein DYB26_007569 [Aphanomyces astaci] RLO02715.1 hypothetical protein DYB28_013813 [Aphanomyces astaci]	PF00082 Subtilase family	IPR000209 Peptidase S8/S53 domain	GO:0004252 serine-type endopeptidase activity / GO:0006508 proteolysis	+SP-TM	4
Ae201684P_13021.1	525	XP_008874773.1 sodium/hydrogen exchanger 3 [Aphanomyces invadans] ETV96509.1 sodium/hydrogen exchanger 3 [Aphanomyces invadans]	PF00999 Sodium/hydrogen exchanger family	IPR006153 Cation/H exchanger	GO:0055085 transmembrane transport / GO:0015385 sodium:proton antiporter activity / GO:0016021 integral component of membrane / GO:0006885 regulation of pH / GO:0015299 solute:proton antiporter activity / GO:0006812 cation transport / GO:0006814 sodium ion transport	-SP	5
Ae201684P_13022.1	201	RHZ27913.1 hypothetical protein DYB26_009624, partial [Aphanomyces astaci]	PF02135 TAZ zinc finger	IPR000197 Zinc finger, TAZ-type	GO:0005634 nucleus / GO:0004402 histone acetyltransferase activity / GO:0006355 regulation of transcription, DNA-templated / GO:0008270 zinc ion binding / GO:0003712 transcription cofactor activity	-SP	6
Ae201684P_13023.1	383	KAF0774676.1 hypothetical protein AaE_001624, partial [Aphanomyces astaci]	PF00782 Dual specificity phosphatase, catalytic domain / PF14671 Dual specificity protein phosphatase, N-terminal half	IPR000340 Dual specificity phosphatase, catalytic domain / IPR029260 Dual specificity/tyrosine protein phosphatase, N-terminal	GO:0008138 protein tyrosine/serine/threonine phosphatase activity / GO:0004721 phosphoprotein phosphatase activity / GO:0006470 protein dephosphorylation / GO:0007096 regulation of exit from mitosis / GO:0016311 dephosphorylation / GO:0004725 protein tyrosine phosphatase activity / GO:0016791 phosphatase activity	-SP	7
Ae201684P_13024.1	171	RHY79228.1 hypothetical protein DYB26_006538, partial [Aphanomyces astaci]	-	-	-	-SP	8
Ae201684P_13025.1	125	-	-	-	-	-SP	9
Ae201684P_13026.1	483	RHY69062.1 hypothetical protein DYB38_007645, partial [Aphanomyces astaci] RHZ13450.1 hypothetical protein DYB31_007572 [Aphanomyces astaci] RHZ29242.1 hypothetical protein DYB26_007569 [Aphanomyces astaci] RLO02715.1 hypothetical protein DYB28_013813 [Aphanomyces astaci]	PF00082 Subtilase family	IPR000209 Peptidase S8/S53 domain	GO:0004252 serine-type endopeptidase activity / GO:0006508 proteolysis	+SP-TM	10
Ae201684P_13027.1	484	RHY69062.1 hypothetical protein DYB38_007645, partial [Aphanomyces astaci] RHZ13450.1 hypothetical protein DYB31_007572 [Aphanomyces astaci] RHZ29242.1 hypothetical protein DYB26_007569 [Aphanomyces astaci] RLO02715.1 hypothetical protein DYB28_013813 [Aphanomyces astaci]	PF00082 Subtilase family	IPR000209 Peptidase S8/S53 domain	GO:0004252 serine-type endopeptidase activity / GO:0006508 proteolysis	+SP-TM	11
Ae201684P_13028.1	93	RHY47483.1 hypothetical protein DYB38_010389, partial [Aphanomyces astaci]	PF00067 Cytochrome P450	IPR001128 Cytochrome P450	GO:0020037 heme binding / GO:0016705 oxidoreductase activity, acting on paired donors, with incorporation or reduction of molecular oxygen / GO:0005506 iron ion binding / GO:0004497 monooxygenase activity / GO:0055114 oxidation-reduction process	-SP	12
Ae201684P_13029.1	109	KAF0775218.1 hypothetical protein AaE_001082, partial [Aphanomyces astaci]	-	-	-	-SP	13
Ae201684P_13030.1	486	RHY69062.1 hypothetical protein DYB38_007645, partial [Aphanomyces astaci] RHZ13450.1 hypothetical protein DYB31_007572 [Aphanomyces astaci] RHZ29242.1 hypothetical protein DYB26_007569 [Aphanomyces astaci] RLO02715.1 hypothetical protein DYB28_013813 [Aphanomyces astaci]	PF00082 Subtilase family	IPR000209 Peptidase S8/S53 domain	GO:0004252 serine-type endopeptidase activity / GO:0006508 proteolysis	+SP-TM	14
Ae201684P_13031.1	489	RHY69062.1 hypothetical protein DYB38_007645, partial [Aphanomyces astaci] RHZ13450.1 hypothetical protein DYB31_007572 [Aphanomyces astaci] RHZ29242.1 hypothetical protein DYB26_007569 [Aphanomyces astaci] RLO02715.1 hypothetical protein DYB28_013813 [Aphanomyces astaci]	PF00082 Subtilase family	IPR000209 Peptidase S8/S53 domain	GO:0004252 serine-type endopeptidase activity / GO:0006508 proteolysis	+SP-TM	15
Ae201684P_13032.1	144	-	Small Secreted Protein (SSP)	-	-	+SP-TM	16
Ae201684P_13033.1	270	RHY37227.1 hypothetical protein DYB34_010113, partial [Aphanomyces astaci]	PF00082 Subtilase family	IPR000209 Peptidase S8/S53 domain	GO:0004252 serine-type endopeptidase activity / GO:0006508 proteolysis	-SP	17
Ae201684P_13034.1	297	KAF0703688.1 hypothetical protein AaE_015271, partial [Aphanomyces astaci]	PF13358 DDE superfamily endonuclease / PF01498 Transposase	IPR002492 Transposase, Tc1-like / IPR038717 Tc1-like transposase, DDE domain	GO:0015074 DNA integration / GO:0003677 DNA binding / GO:0006313 transposition, DNA-mediated	-SP	18
Ae201684P_13035.1	483	RHY69062.1 hypothetical protein DYB38_007645, partial [Aphanomyces astaci] RHZ13450.1 hypothetical protein DYB31_007572 [Aphanomyces astaci] RHZ29242.1 hypothetical protein DYB26_007569 [Aphanomyces astaci] RLO02715.1 hypothetical protein DYB28_013813 [Aphanomyces astaci]	PF00082 Subtilase family	IPR000209 Peptidase S8/S53 domain	GO:0004252 serine-type endopeptidase activity / GO:0006508 proteolysis	+SP-TM	19
Ae201684P_13036.1	142	KAF0768144.1 hypothetical protein AaE_002805, partial [Aphanomyces astaci]	-	-	-	-SP	20
Ae201684P_13037.1	105	RHY69062.1 hypothetical protein DYB38_007645, partial [Aphanomyces astaci] RHZ13450.1 hypothetical protein DYB31_007572 [Aphanomyces astaci] RHZ29242.1 hypothetical protein DYB26_007569 [Aphanomyces astaci] RLO02715.1 hypothetical protein DYB28_013813 [Aphanomyces astaci]	-	-	-	-SP	21
Ae201684P_13038.1	241	RHZ13451.1 hypothetical protein DYB31_007571, partial [Aphanomyces astaci]	Small Secreted Protein (SSP)	-	-	+SP-TM	22
Ae201684P_13039.1	233	RHY37227.1 hypothetical protein DYB34_010113, partial [Aphanomyces astaci]	PF00082 Subtilase family	IPR000209 Peptidase S8/S53 domain	GO:0004252 serine-type endopeptidase activity / GO:0006508 proteolysis	-SP	23
Ae201684P_13040.1	599	RLO11409.1 hypothetical protein DYB28_001768, partial [Aphanomyces astaci]	-	-	-	+SP-TM	24
Ae201684P_13041.1	492	KAF0711727.1 hypothetical protein As57867_005100, partial [Aphanomyces stellatus]	PF00082 Subtilase family	IPR000209 Peptidase S8/S53 domain	GO:0004252 serine-type endopeptidase activity / GO:0006508 proteolysis	+SP-TM	25
Ae201684P_13042.1	492	KAF0711727.1 hypothetical protein As57867_005100, partial [Aphanomyces stellatus]	PF00082 Subtilase family	IPR000209 Peptidase S8/S53 domain	GO:0004252 serine-type endopeptidase activity / GO:0006508 proteolysis	+SP-TM	26

## Sheet: ST S5 RNASeq
ST S5 : Expression of extracellular proteases of A. euteiches at 1, 3 and 9 days after infection of Medicago truncatula roots.
Data are related to Gaulin et al., BMC Biol 2018 and available in BioProject PRJNA431223
*ID number are related to AphanoDB database
Values are Log2(Fold Change) with p-value <0.05
ID*	1 dpi	3 dpi	9 dpi
Ae201684P_881	-	-	-
Ae201684P_2485	-	-1.60267551693038	-1.18214618361313
Ae201684P_2515	2.56896212256841	4.45984418312822	3.44283172214074
Ae201684P_2526	3.81164601190207	4.45680889206993	3.50197224707298
Ae201684P_3220	-	1.2145869621671	1.58051261721094
Ae201684P_3583	-	1.20840640921842	-
Ae201684P_3622	1.92629763448214	1.51493194621305	-
Ae201684P_3656	-	-1.90188699862376	-
Ae201684P_4425	2.53426824799815	3.05326621590938	1.76524304282783
Ae201684P_4608	-	1.72520905925421	1.4671397852295
Ae201684P_4615	-	-0.522721523260578	-
Ae201684P_4616	-0.965844789382337	-0.786230942709972	-
Ae201684P_5765	2.5140565364629	2.7156539012076	2.75999870879573
Ae201684P_5879	-	-	-
Ae201684P_5903	-	-	-
Ae201684P_7336	-	-	-
Ae201684P_7338	-	-	-
Ae201684P_7340	-	-	-
Ae201684P_7343	-	2.83686802522152	2.59935154351264
Ae201684P_7345	-	-2.53356452393893	-1.92426528413448
Ae201684P_7509	-	-4.28088881671047	-4.37608643577301
Ae201684P_7551	1.9097173053104	1.12062618981249	1.36776324107317
Ae201684P_7869	-	-	-
Ae201684P_8222	-1.21303403410761	-1.21779218975943	-0.980031750557561
Ae201684P_8313	-	-	-
Ae201684P_8401	-	-	-
Ae201684P_8405	-	-	-
Ae201684P_8407	5.96002850899003	6.236989271308	5.28414923787317
Ae201684P_8409	4.52475361723844	5.85868019748128	4.75463422771132
Ae201684P_8410	2.28227452197251	4.36964216711272	2.92800701811217
Ae201684P_8412	8.12587021229516	10.647437758997	8.69810346689814
Ae201684P_8413	-	-	-
Ae201684P_8414	-	2.34362341282465	2.30688208491628
Ae201684P_8415	-	1.14070206451649	0.555995495450196
Ae201684P_8417	3.4032392200968	4.24770679474661	2.18334228511948
Ae201684P_8418	-	3.92741981423596	3.14107988597094
Ae201684P_8421	-	-	-
Ae201684P_8564	-	-	-
Ae201684P_8949	-	-	-
Ae201684P_9494	-	-2.04210838099476	-
Ae201684P_9496	-	-	-
Ae201684P_12194	-	-	-
Ae201684P_12195	-	-	-
Ae201684P_12779	0.675613364894079	1.47564022539976	0.992318929132842
Ae201684P_12838	-	-	-
Ae201684P_12839	-	-	-
Ae201684P_12841	-	3.12559497560103	2.79513477360207
Ae201684P_13017	-	-	-
Ae201684P_13018	-	-1.78994078951141	-
Ae201684P_13019	-	-	-
Ae201684P_13020	2.54316982785758	-	-
Ae201684P_13026	2.35395445205981	3.37385586287582	2.44969862539144
Ae201684P_13027	-	-2.71501530399132	-3.94880887899227
Ae201684P_13030	1.68319209082913	1.62284755510487	-
Ae201684P_13031	7.66914244769166	8.14485021151578	5.94904675631118
Ae201684P_13035	4.40353456883522	5.11730581245888	3.78630192974452
Ae201684P_13041	4.04195783506994	2.79946860879692	3.2162827903897
Ae201684P_13042	3.45684496316446	2.15801364190217	1.20929489256201
Ae201684P_14158	-	-	-
Ae201684P_14472	2.81819526452008	2.16042156377854	1.47982576996484
Ae201684P_14966	-	-	1.21350160241057
Ae201684P_15015	2.93581152088708	-	2.41229664445309
Ae201684P_15320	-	-	-
Ae201684P_15322	-	-	-
Ae201684P_15628	-	-	-
Ae201684P_15630	-	-	-6.7346244594578
Ae201684P_15633	-	-	-
Ae201684P_15636	-	-	-
Ae201684P_15637	-	-6.08027061520393	-3.93727690181303
Ae201684P_16507	-	1.91472428612454	1.41861213958873
Ae201684P_16508	-	1.29493432479118	0.817126338800161
Ae201684P_16509	-	1.00784916809652	0.720925415021488
Ae201684P_16844	0.599060447155477	-0.465116916614283	-
Ae201684P_17000	-	-4.0285923207196	-1.21619290324848
Ae201684P_17001	-2.06552371465422	-2.79246878527585	-2.30877871654824
Ae201684P_17011	-	-	-
Ae201684P_17014	-	-	-
Ae201684P_17025	-	-	-
Ae201684P_17364	-	-	4.52746942451223
Ae201684P_17618	-	-	-
Ae201684P_17621	-	-	-
Ae201684P_17622	-	-	10.2143190870561
Ae201684P_17623	-	-	-
Ae201684P_17624	-	-	-
Ae201684P_17633	-	-	-
Ae201684P_17635	-	-	-
Ae201684P_17636	3.9516538557271	-	6.31221002997143
Ae201684P_17832	-	-	-
Ae201684P_17837	-	-	-
Ae201684P_17849	-	-	-
Ae201684P_17958	-	-	-
Ae201684P_17961	-	-	-
Ae201684P_17981	-3.17445347897776	-1.10240528426779	-1.78823642191249
Ae201684P_18098	-	-	-
Ae201684P_18099	-	-	-
Ae201684P_18121	-	-	-
Ae201684P_18122	8.52935719836818	9.20620263027924	9.43893765157283
Ae201684P_18134	7.9258235354817	8.66461241432525	7.79168100813559
Ae201684P_18136	7.60557753091651	7.10591701342223	6.40376841793948
Ae201684P_18138	5.46074154540278	6.09474413157743	5.41677801302351
Ae201684P_18142	8.58663313839544	8.50079619793793	8.446178273164
Ae201684P_18143	-	-	-
Ae201684P_18148	9.89349287490481	12.3054698711702	12.7073831707236
Ae201684P_18149	-	-	-
Ae201684P_18153	-	3.00617477924017	1.91270435748294
Ae201684P_18184	6.46742706534671	6.89161706195672	5.01989544483651
Ae201684P_18189	-	-	-
Ae201684P_18190	-	-	-
Ae201684P_18191	-	-	-
Ae201684P_18192	-	-	-
Ae201684P_18193	-	-	-
Ae201684P_18195	-	-	-
Ae201684P_18196	-	-	-
Ae201684P_18198	-	-	-
Ae201684P_18199	-	-	-
Ae201684P_18213	-	-	-
Ae201684P_18227	1.58885791361566	2.91143141784469	1.79056913275342
Ae201684P_18230	-	-	-
Ae201684P_18232	6.38353594140715	8.05303030309632	7.22033216488152
Ae201684P_18235	-	-	-
Ae201684P_18240	7.48581281724763	9.29807526864067	8.23419200233775
Ae201684P_18241	-	-	-
Ae201684P_18242	-	-	-
Ae201684P_18248	-	-	-
Ae201684P_18250	-	-	2.89994713376514
Ae201684P_18278	7.9295698251542	9.201164322643	8.08268027126457
Ae201684P_18288	2.29480870059277	2.43941960274891	1.86332705854532
Ae201684P_18290	15.6227600292047	15.2836871009091	15.2567653868003
Ae201684P_18291	-	-	-
Ae201684P_18292	3.01115383115403	4.53918193464433	3.60258462855724
Ae201684P_18293	15.1202582662073	15.4461207372945	12.6053445852699
Ae201684P_18294	11.5235530114215	10.4747950463821	8.22594013575628
Ae201684P_18296	12.1792586373477	11.5636493662731	11.5372822570754
Ae201684P_18304	5.3530174044182	4.84832509899695	4.11256047326558
Ae201684P_18544	-	-	-
Ae201684P_18884	-	-	0.683860170698112
Ae201684P_18997	-	-	-
Ae201684P_18998	-	-	-
Ae201684P_18999	-	-	-
Ae201684P_19127	-	4.31564502148323	4.15123672492339
Ae201684P_19215	-	-2.0144739524155	-
Ae201684P_20177	-1.27919853238374	-1.37414275822921	-0.883225404696885
Ae201684P_20178	-	1.1755241984497	-
Ae201684P_20179	-	-	4.99769343516362
Ae201684P_21230	7.16038877228443	-	-
Ae201684P_21663	-	-	-
Ae201684P_22110	-	-	-
Ae201684P_22251	-	-	-
Ae201684P_22252	-	-	-
Ae201684P_22253	-	-	-
Ae201684P_22254	-	-	-

## Sheet: ST S6 Proteomics results
ST S6 : Protein Groups (PG #52) Serine and Cysteine hydrolases identified in the proteomics analysis and their LFQ (Lable-Free Quantification) Intensities
ID number are related to AphanoDB database
	Pull-down with probes				No-Probe-Control pull-down
PG ID	LFQ Intensity 13	LFQ Intensity 14	LFQ Intensity 15	LFQ Intensity 16	LFQ Intensity 21	LFQ Intensity 22	LFQ Intensity 23	LFQ Intensity 24	Protein_IDs	p-val enrichment in Pull-Down with probes	Peptide counts (all)
77	22.394	25.166	0	23.592	19.237	0	0	0	Ae201684P_11434.t1;Ae201684P_11433.t1	0.141	5;4
118	24.949	25.189	0	22.478	0	0	0	0	Ae201684P_12655.t1	0.024	2
122	25.915	27.446	25.454	26.294	19.872	0	0	0	Ae201684P_13030.t1;Ae201684P_13027.t1;Ae201684P_13020.t1	0.005	8;4;3
123	32.099	33.94	29.148	31.686	19.668	0	0	20.763	Ae201684P_13031.t1;Ae201684P_13018.t1;Ae201684P_13033.t1;Ae201684P_13039.t1;Ae201684P_13017.t1	0.011	16;4;2;1;1
124	25.981	28.743	24.76	26.969	0	0	0	0	Ae201684P_13035.t1	0	8
125	23.253	24.435	0	24.082	0	0	0	0	Ae201684P_13042.t1	0.024	3
128	27.836	29.48	0	25.293	0	0	0	0	Ae201684P_13084.t1;Ae201684P_13084.t2	0.025	9;7
145	29.254	30.796	28.939	29.549	19.118	0	20.9	0	Ae201684P_13731.t1;Ae201684P_13734.t1;Ae201684P_22133.t1	0.015	9;9;2
163	27.395	28.179	22.867	26.667	0	0	0	0	Ae201684P_14471.t1;Ae201684P_14461.t1	0	10;4
164	31.739	32.475	24.918	30.239	21.593	22.89	0	20.366	Ae201684P_14474.t1	0.054	17
165	29.111	30.899	25.684	27.873	0	0	0	0	Ae201684P_14477.t1	0	12
166	28.775	29.795	27.277	28.521	0	0	0	0	Ae201684P_14478.t1	0	7
167	24.474	27.722	23.225	24.731	0	0	0	0	Ae201684P_14487.t1	0	5
170	20.049	22.7	0	21.755	0	0	0	0	Ae201684P_1459.t1	0.024	3
171	24.587	26.186	0	22.27	0	0	0	0	Ae201684P_1461.t1	0.025	5
172	22.387	25.114	20.716	21.749	0	0	0	0	Ae201684P_1462.t1	0	4
174	26.105	27.262	23.593	25.745	0	0	0	0	Ae201684P_1464.t1	0	5
181	26.838	27.163	23.156	26.402	0	0	0	0	Ae201684P_14966.t1	0	5
185	23.14	25.431	22.712	23.181	0	0	0	0	Ae201684P_15388.t1;Ae201684P_15392.t1	0	4;1
195	23.939	26.588	0	22.309	0	0	0	0	Ae201684P_15867.t1	0.025	2
230	23.211	25.117	24.378	0	22.351	0	22.597	0	Ae201684P_16779.t1	0.465	3
231	33.09	33.922	31.727	32.675	23.158	0	0	0	Ae201684P_16844.t1	0.003	12
236	23.64	24.018	22.492	24.136	0	0	0	0	Ae201684P_17000.t1	0	4
237	25.762	26.689	25.13	26.243	0	0	0	0	Ae201684P_17001.t1	0	6
259	28.582	30.741	23.187	28.473	0	0	0	0	Ae201684P_18143.t1;Ae201684P_18122.t1;Ae201684P_18121.t1;Ae201684P_18142.t1;Ae201684P_18148.t1;Ae201684P_18137.t1;Ae201684P_18213.t1	0	8;8;8;7;3;1;1
260	26.753	27.656	24.234	26.245	0	0	0	0	Ae201684P_18134.t1	0	5
261	23.678	25.728	0	23.576	0	0	0	0	Ae201684P_18136.t1	0.024	7
262	23.781	25.698	0	24.172	20.072	0	0	0	Ae201684P_18138.t1	0.143	7
271	26.729	28.209	23.697	24.342	0	0	0	0	Ae201684P_18544.t1	0	7
289	25.196	27.255	23.734	24.046	0	0	0	0	Ae201684P_19307.t1;Ae201684P_7825.t1	0	5;1
308	28.819	29.656	27.024	28.122	0	0	0	0	Ae201684P_20138.t1	0	9
310	26.62	28.711	25.486	26.44	0	0	0	0	Ae201684P_20178.t1;Ae201684P_20177.t1	0	11;2
315	27.175	28.439	25.84	26.76	0	0	0	0	Ae201684P_2038.t1	0	12
346	22.355	24.033	0	21.956	0	0	0	21.066	Ae201684P_22262.t2;Ae201684P_22262.t1	0.179	2;2
354	27.697	28.834	27.065	27.975	0	0	0	0	Ae201684P_22453.t1	0	6
369	22.69	23.873	0	23.761	0	0	19.336	0	Ae201684P_2840.t1	0.145	2
370	25.29	24.993	0	21.328	0	0	0	0	Ae201684P_2900.t1;Ae201684P_2899.t1	0.025	4;2
382	22.303	24.301	0	23.47	0	0	0	0	Ae201684P_3220.t1	0.024	2
401	25.78	27.667	24.496	23.893	0	0	0	0	Ae201684P_3650.t1;Ae201684P_3648.t1;Ae201684P_3651.t1;Ae201684P_3652.t1	0	9;3;1;1
410	29.365	30.945	28.267	30.183	0	0	0	0	Ae201684P_4425.t1	0	16
418	28.157	29.073	24.543	27.2	0	0	0	0	Ae201684P_4615.t1	0	6
419	29.021	31.955	27.168	29.969	19.619	23.442	0	0	Ae201684P_4616.t1	0.025	14
420	24.543	25.176	22.439	24.219	0	0	0	0	Ae201684P_4632.t1	0	3
422	25.823	26.899	24.787	25.31	0	0	0	0	Ae201684P_4647.t1	0	3
441	27.058	28.961	24.166	26.497	26.387	23.043	21.201	23.143	Ae201684P_5242.t1;Ae201684P_5239.t1	0.069	18;1
482	26.373	25.334	23.63	23.763	0	0	0	0	Ae201684P_7509.t1	0	5
484	27.003	29.074	23.87	26.624	0	0	0	20.885	Ae201684P_7551.t1	0.007	9
503	23.658	25.523	0	22.815	0	0	0	0	Ae201684P_822.t1	0.024	3
504	26.631	28.986	23.763	25.749	0	0	0	0	Ae201684P_8222.t1	0	5
506	25.319	27.098	0	24.535	0	0	0	0	Ae201684P_8366.t1	0.024	4
507	27.987	29.92	26.28	28.691	0	0	0	0	Ae201684P_8407.t1;Ae201684P_8412.t1;Ae201684P_8410.t1	0	6;2;1
508	25.61	27.89	25.162	26.567	0	0	0	0	Ae201684P_8409.t1	0	3
509	22.523	23.483	22.255	23.27	0	0	0	0	Ae201684P_8414.t1	0	2
510	26.12	28.208	24.729	28.114	0	0	0	0	Ae201684P_8415.t1	0	5
511	23.282	24.65	21.992	24.764	0	0	0	0	Ae201684P_8417.t1	0	4
520	26.804	25.597	25.342	26.126	0	0	0	0	Ae201684P_8807.t1	0	5
533	22.886	23.729	0	23.932	0	0	0	0	Ae201684P_9161.t2;Ae201684P_9161.t1	0.024	3;3
537	21.917	25.194	0	22.235	0	0	0	0	Ae201684P_9436.t1	0.025	2
538	26.684	28.292	26.298	26.546	0	0	0	0	Ae201684P_9494.t1	0	4

## Sheet: ST S7 Proteins
ST S7 : Proteomics identification of proteases using ABPP approach on intercellular fluid from pea roots infected by A. euteiches
ID number are related to AphanoDB database
*SP (SignalP prediction) | TM (TMHMM prediction)
** ApoplastP (https://apoplastp.csiro.au/), machine learning method for predicting localization of proteins to the plant apoplast
ID	Pfam	SignalP/TMHMM*	ApoplastP**
Ae201684P_13030.t1	PF00082 Subtilase family	+SP-TM	Apoplastic
Ae201684P_13031.t1	PF00082 Subtilase family	+SP-TM	Apoplastic
Ae201684P_13035.t1	PF00082 Subtilase family	+SP-TM	Apoplastic
Ae201684P_13020.t1	PF00082 Subtilase family	+SP-TM	Apoplastic
Ae201684P_13033.t1	PF00082 Subtilase family	-SP	Apoplastic
Ae201684P_13027.t1	PF00082 Subtilase family	+SP-TM	Apoplastic
Ae201684P_13018.t1	PF00082 Subtilase family	+SP-TM	Apoplastic
Ae201684P_18143.t1	PF00089 Trypsin	+SP-TM	Apoplastic
Ae201684P_18134.t1	PF00089 Trypsin	+SP-TM	Apoplastic
Ae201684P_18136.t1	PF00089 Trypsin	+SP-TM	Apoplastic
Ae201684P_9494.t1	PF00089 Trypsin	+SP-TM	Apoplastic
Ae201684P_18148.t1	PF00089 Trypsin	+SP-TM	Apoplastic
Ae201684P_18142.t1	PF00089 Trypsin	+SP-TM	Apoplastic
Ae201684P_18121.t1	PF00089 Trypsin	+SP-TM	Apoplastic
Ae201684P_18122.t1	PF00089 Trypsin	+SP-TM	Apoplastic
Ae201684P_7551.t1	PF00112 Papain family cysteine protease	+SP-TM	Non-apoplastic
Ae201684P_8409.t1	PF00112 Papain family cysteine protease	+SP-TM	Apoplastic
Ae201684P_8417.t1	PF00112 Papain family cysteine protease	+SP-TM	Apoplastic
Ae201684P_8412.t1	PF00188 Cysteine-rich secretory protein family CAP / PF00112 Papain family cysteine protease	+SP-TM	Apoplastic
Ae201684P_14471.t1	PF00450 Serine carboxypeptidase	-SP	Apoplastic
Ae201684P_14477.t1	PF00450 Serine carboxypeptidase	-SP	Apoplastic
Ae201684P_14487.t1	PF00450 Serine carboxypeptidase	-SP	Apoplastic
Ae201684P_1464.t1	PF00450 Serine carboxypeptidase	-SP	Apoplastic
Ae201684P_4632.t1	PF00450 Serine carboxypeptidase	-SP	Apoplastic
Ae201684P_8222.t1	PF00450 Serine carboxypeptidase S10	+SP-TM	Non-apoplastic
Ae201684P_14461.t1	PF00450 Serine carboxypeptidase	-SP	Apoplastic
Ae201684P_8407.t1	PF00734 Fungal cellulose binding domain / PF00112 Papain family cysteine protease	+SP-TM	Apoplastic
Ae201684P_8415.t1	PF04886 PT repeat / PF00188 Cysteine-rich secretory protein family CAP / PF00112 Papain family cysteine protease	+SP-TM	Apoplastic
Ae201684P_17000.t1	PF05577 Serine carboxypeptidase S28	+SP-TM	Apoplastic
Ae201684P_17001.t1	PF05577 Serine carboxypeptidase S28	+SP-TM	Apoplastic
Ae201684P_18544.t1	PF05577 Serine carboxypeptidase S28	+SP-TM	Non-apoplastic
Ae201684P_4425.t1	PF05577 Serine carboxypeptidase S28	+SP-TM	Apoplastic
Ae201684P_14966.t1	PF08246 Cathepsin propeptide inhibitor domain (I29) / PF00112 Papain family cysteine protease	+SP-TM	Non-apoplastic
Ae201684P_4615.t1	PF08246 Cathepsin propeptide inhibitor domain (I29) / PF02221 ML domain / PF00112 Papain family cysteine protease	+SP-TM	Non-apoplastic
Ae201684P_4616.t1	PF08246 Cathepsin propeptide inhibitor domain (I29) / PF02221 ML domain / PF00112 Papain family cysteine protease	+SP-TM	Non-apoplastic
Ae201684P_20178.t1	PF14295 PAN domain / PF00082 Subtilase family	+SP-TM	Apoplastic
Ae201684P_20177.t1	PF14295 PAN domain / PF00082 Subtilase family	+SP-TM	Apoplastic
Ae201684P_16844.t1	PF08246 Cathepsin propeptide inhibitor domain (I29) / PF00112 Papain family cysteine protease	+SP-TM	Non-apoplastic
Ae201684P_8414.t1	PF00188 Cysteine-rich secretory protein family CAP / PF00112 Papain family cysteine protease	+SP-TM	Apoplastic
Ae201684P_7509.t1	PF00112 Papain family cysteine protease	+SP-TM	Non-apoplastic
Ae201684P_3220.t1	PF00112 Papain family cysteine protease	+SP-TM	Non-apoplastic
Ae201684P_13042.t1	PF00082 Subtilase family	+SP-TM	Apoplastic
